# Supplementary material
Source: PubMed Central journal article supplement (PMC10472453)
Supplement: NIHMS1923510-supplement-Supplementary_Material.pdf [file NIHMS1923510-supplement-Supplementary_Material.pdf]

**Appendix**  
**Providing Quality Family Planning Services: Developing Federal Clinical Care Recommendations For Men**  
**Marcell et al.**

**Appendix A. Services Considered to Include in Guidance as Part of the Review Process**

| Panel                                                          | Technical group services to include |                | Expert work group services to include |                   |
|----------------------------------------------------------------|-------------------------------------|----------------|---------------------------------------|-------------------|
|                                                                | No                                  | Yes            | No                                    | Yes               |
| Screening sexual and reproductive health-related services      |                                     |                |                                       |                   |
| History                                                        |                                     |                |                                       |                   |
| 1. Puberty and sexuality                                       |                                     | X <sup>a</sup> | X <sup>b</sup>                        |                   |
| 2. Relationships and dating                                    |                                     | X <sup>a</sup> | X <sup>b</sup>                        |                   |
| 3. Sexual behavior                                             |                                     | X              |                                       | X                 |
| 4. Problems with sexual function                               |                                     | X              | X <sup>c</sup>                        |                   |
| 5. Pregnancy prevention/contraception including condoms        |                                     | X              |                                       | X <sup>d</sup>    |
| 6. Father, pregnancy history                                   |                                     | X              |                                       | X                 |
| 7. Testicular self-exam                                        | X <sup>e</sup>                      |                |                                       |                   |
| 8. Depression                                                  | X <sup>f</sup>                      |                |                                       | X <sup>g</sup>    |
| 9. Suicide                                                     | X <sup>f</sup>                      |                |                                       | X <sup>h</sup>    |
| 10. Violence prevention (e.g., intimate partner violence)      |                                     | X              | X <sup>i</sup>                        |                   |
| 11. Abuse history (e.g., physical, sexual, emotional)          |                                     | X              | X <sup>i</sup>                        |                   |
| 12. Tobacco use                                                |                                     | X              |                                       | X                 |
| 13. Alcohol and other drug use                                 |                                     | X              |                                       | X                 |
| 14. Physical activity                                          | X <sup>f</sup>                      |                |                                       |                   |
| 15. Healthy diet                                               | X <sup>f</sup>                      |                |                                       |                   |
| 16. Immunizations (i.e., HBV, HPV)                             |                                     | X              |                                       | X <sup>j</sup>    |
| Physical exam                                                  |                                     |                |                                       |                   |
| 1. Sexual maturity rating                                      |                                     | X              |                                       | X                 |
| 2. Gynecomastia exam                                           | X <sup>f</sup>                      |                |                                       |                   |
| 3. Genital exam                                                |                                     | X              |                                       | X                 |
| 4. Testicular cancer screen                                    | X <sup>e</sup>                      |                |                                       |                   |
| 5. Hernia                                                      | X <sup>b</sup>                      |                |                                       |                   |
| 6. Anal inspection                                             | X <sup>f</sup>                      |                |                                       |                   |
| 7. Rectal exam                                                 | X <sup>f</sup>                      |                |                                       |                   |
| 8. Blood pressure (e.g., HTN)                                  |                                     | X              |                                       | X                 |
| 9. BMI (e.g., obesity)                                         |                                     | X              |                                       | X                 |
| 10. Exam components (e.g., heart, lungs, abdomen, extremities) | X <sup>b</sup>                      |                |                                       |                   |
| 11. Skin (e.g., cancer)                                        | X <sup>f</sup>                      |                |                                       |                   |
| Laboratory tests                                               |                                     |                |                                       |                   |
| 1. Chlamydia                                                   |                                     | X              |                                       | X                 |
| 2. Gonorrhea                                                   |                                     | X              |                                       | X                 |
| 3. Hepatitis B                                                 | X <sup>e</sup>                      |                |                                       |                   |
| 4. Hepatitis C                                                 | X <sup>e, k</sup>                   |                |                                       | X <sup>k</sup>    |
| 5. Herpes simplex                                              | X <sup>e</sup>                      |                |                                       |                   |
| 6. Syphilis                                                    |                                     | X              |                                       | X                 |
| 7. HIV infection                                               |                                     | X              |                                       | X                 |
| 8. Anal Pap                                                    | X <sup>b</sup>                      |                |                                       |                   |
| 9. Prostate cancer screen                                      | X <sup>f</sup>                      |                |                                       |                   |
| 10. Cholesterol/lipids                                         | X <sup>f</sup>                      |                |                                       |                   |
| 11. Diabetes                                                   | X <sup>f</sup>                      |                |                                       | X <sup>g</sup>    |
| 12. HGB/HCT                                                    | X <sup>b</sup>                      |                |                                       |                   |
| 13. Urinalysis                                                 | X <sup>b</sup>                      |                |                                       |                   |
| Counseling                                                     |                                     |                |                                       |                   |
| 1. Demonstrate condom/practice                                 |                                     | X              | X <sup>b</sup>                        |                   |
| 2. Emergency contraception counseling                          |                                     | X              |                                       | X <sup>d, m</sup> |
| 3. STD/HIV counseling                                          |                                     | X              |                                       | X <sup>l, m</sup> |
| 4. Obesity counseling                                          | X <sup>f</sup>                      |                |                                       | X <sup>l, m</sup> |

<sup>a</sup>Recommended to combine and include as part of expanded sexual and reproductive health services for men.

<sup>b</sup>Evidence base not established.

<sup>c</sup>Beyond definition of family planning for clinical guidelines.

**Appendix**  
**Providing Quality Family Planning Services: Developing Federal Clinical Care Recommendations For Men**  
**Marcell et al.**

<sup>d</sup>Incorporated into contraception services.

<sup>e</sup>Evidence recommends against service.

<sup>f</sup>Service not recommended since part of primary care.

<sup>g</sup>Services recommended based on preconception health guidance.

<sup>h</sup>Service recommended if depression symptoms identified.

<sup>i</sup>Insufficient evidence to recommend for or against service.

<sup>j</sup>For example, HBV and HPV sexual and reproductive health-related vaccines; technical panel discussed inclusion of hepatitis A virus (HAV) vaccine but not after expert panel.

<sup>k</sup>Review occurred prior to CDC and U.S. Preventive Services Task Force (USPSTF) update.

<sup>l</sup>Service recommended based on identification of risk.

<sup>m</sup>Counseling service incorporated into related screening item (e.g., sexual behavior, BMI) rather than in separate counseling section.

HBV, hepatitis B virus; HCT, hematocrit; HGB, hemoglobin; HPV, human papillomavirus; HTN, hypertension; STD, sexually transmitted disease.

**Appendix B.** Federal Agencies and Professional Organizations From Which Recommendations Were Sought

---

- American Academy of Child and Adolescent Psychiatry (AACAP)
  - American Academy of Family Physicians (AAFP)
  - American Academy of Nurse Practitioners (AANP)
  - American Academy of Pediatrics (AAP)
  - American Cancer Society (ACS)
  - American College of Physicians/American Society of Internal Medicine (ACP)
  - American College of Preventive Medicine (ACPM)
  - American Diabetes Association (ADA)
  - American Heart Association (AHA)
  - American Medical Association (AMA)
  - American Society for Reproductive Medicine (ASRM)
  - American Urological Association (AUA)
  - Centers for Disease Control and Prevention (CDC)
    - HIV/AIDS
    - Immunization
    - STD treatment
    - Select Panel on Preconception Care
  - Family Violence Prevention Fund—Futures Without Violence (FVPF)
  - National Association of Pediatric Nurse Practitioners (NAPNAP)
  - National Heart, Lung, and Blood Institute (NHLBI)
  - Society for Adolescent Health and Medicine (SAHM)
  - U.S. Public Health Service (USPHS)
  - U.S. Preventive Services Task Force (USPSTF)
-

**Appendix C. Technical Panel Participants**

---

David Bell, MD, MPH, Columbia University

Willard Cates, MD, MPH, Family Health International and Professor University of North Carolina, Chapel Hill

Linda Creegan, MS, FNP, California STD/HIV Prevention Training Center

Dennis Fortenberry, MD, MS, Indiana University School of Medicine

Robert Garofalo, MD, MPH, Children's Memorial Hospital, Northwestern University

Wendy Grube, PhD, CRNP, University of Pennsylvania School of Nursing

Robert L. Johnson, MD, New Jersey Medical School

Arik V. Marcell, MD, MPH, The Johns Hopkins School of Medicine<sup>a</sup>

Elissa Meites, MD, MPH, Division of STD Prevention, CDC

Demetrius Porche, DNS, APRN, PhD, Louisiana State University Health Sciences Center School of Nursing

Anne Rompalo, MD, ScM, Johns Hopkins School of Medicine, Johns Hopkins STD/HIV Prevention Training Center

Jacki Witt, JD, MSN, RNC, WHNP, CNM, Clinical Training Center for Family Planning, University of Missouri, Kansas City

Thomas Walsh, MD, University of Washington Medical Center

Sandra Wolf, MD, Drexel University School of Medicine

---

<sup>a</sup>Chair, Technical Panel

**Appendix D. Title X Expert Work Group Panel**

---

Stephanie Bell, Centers for Medicare and Medicaid Services  
Courtney Benedict, MSN, Marin Community Clinics  
Jan Chapin, MPH, American College of Obstetricians and Gynecologists  
Clare Coleman, President and CEO, National Family Planning and Reproductive Health Association  
Vanessa Cullins, MD, Planned Parenthood Federation of America  
Daryn Eikner, MS, Family Planning Council  
Jule Hallerdin, MN, Advisor to the Office of Population Affairs  
Mark Hathaway, MD, Unity Health Care and Washington Hospital Center  
Seiji Hayashi, MD, Bureau of Primary Health Care, Health Resources and Services Administration  
Beth Jordan, MD, Association of Reproductive Health Professionals  
Ann Loeffler, MSPH, John Snow Research and Training Institute  
Arik V. Marcell, MD, Johns Hopkins and the Male Training Center  
Tom Miller, MD, Alabama Department of Health  
Deborah Nucatola, MD, Planned Parenthood Federation of America  
Michael Policar, MD, State of California and UCSF Bixby Center  
Adrienne Stith-Butler, PhD, Keck Center of the National Academies  
Denise Wheeler, ARNP, Iowa Department of Public Health  
Gayla Winston, MPH, Indiana Family Health Council  
Jacki Witt, MSN, Clinical Training Center for Family Planning, University of Missouri, Kansas City  
Jamal Gwathney, MD, Bureau of Primary Health Care, Health Resources and Services Administration

---
